# Supplementary material for: Does Time-to-Chemotherapy after Primary Complete Macroscopic Cytoreductive Surgery Influence Prognosis for Patients with Epithelial Ovarian Cancer? A Study of the FRANCOGYN Group
Source: PubMed Central journal article supplement (PMC7961531; doi:10.3390/jcm10051058), 2021-03-04
Supplement: jcm-10-01058-s001.pdf [file jcm-10-01058-s001.pdf]

**SUPPLEMENTARY DATA**

Table S1: Characteristics of Patients in the early-stage group. Time-to-Chemotherapy before and after 6 weeks

| Variables          | -                          | ≤6 weeks (n = 27) | >6 weeks (n = 42) | p     |
|--------------------|----------------------------|-------------------|-------------------|-------|
| Age (years)        |                            | 58 (+/- 14)       | 58 (+/- 12)       | 0.93  |
| BMI (Kg/m2)        |                            | 24.51 (+/- 5.25)  | 25.84 (+/- 6.28)  | 0.38  |
| Hormonal Status    | Menopause                  | 18 (69.2%)        | 29 (72.5%)        | 0.77  |
|                    | Menopausal Hormone Therapy | 4 (36.4%)         | 5 (25%)           | 0.8   |
| Parity             |                            | 1.2 (+/- 1.44)    | 1.211 (+/- 1.02)  | 0.97  |
| Mutation           | BRCA 1                     | 1 (14.3%)         | 2 (22.2%)         | 0.76  |
|                    | BRCA 2                     | NA                | NA                |       |
| Hypertension       |                            | 8 (36.4%)         | 7 (25%)           | 0.38  |
| Diabetes           |                            | 3 (15.8%)         | 1 (3.6%)          | 0.29  |
| Smoking            |                            | 2 (10%)           | 4 (13.3%)         | 1     |
| Histologic type    | Serous                     | 10 (37%)          | 19 (45.2%)        | 0.52  |
|                    | Endometrioid               | 8 (29.6%)         | 14 (33.3%)        |       |
|                    | Clear Cell                 | 6 (22.2%)         | 8 (19%)           |       |
|                    | Mucinous                   | 3 (11.1%)         | 1 (2.4%)          |       |
| Grade              | 1                          | 5 (83.3%)         | 6 (50%)           | 0.19  |
|                    | 2                          | 0                 | 5 (41.7%)         |       |
|                    | 3                          | 1 (16.7%)         | 1 (8.3%)          |       |
| FIGO Stage         | I                          | 18 (66.7%)        | 38 (90.5%)        | 0.025 |
|                    | IIA                        | 9 (33.3%)         | 4 (9.5%)          |       |
| Type of recurrence | Lymph node                 | 2 (18.2%)         | 1 (11.1%)         | 0.68  |
|                    | Peritoneal Carcinomatosis  | 6 (54.5%)         | 6 (66.7%)         |       |
|                    | Metastasis                 | 1 (9.1%)          | 2 (22.2%)         |       |

Table S2: Characteristics of Patients in the early-stage group. Time-to-Chemotherapy before and after 8 weeks

| Variables          |                            | ≤8weeks (n = 48) | >8weeks (n = 21) | p    |
|--------------------|----------------------------|------------------|------------------|------|
| Age (years)        |                            | 58 (+/- 12)      | 56 (+/- 14)      | 0.44 |
| BMI (Kg/m2)        |                            | 25.25 (+/- 5.91) | 25.4 (+/- 5.93)  | 0.93 |
| Hormonal Status    | Menopause                  | 33 (73.3%)       | 14 (66.7%)       | 0.58 |
|                    | Menopausal Hormone Therapy | 5 (23.8%)        | 4 (40%)          | 0.42 |
| Parity             |                            | 1.196 (+/- 1.24) | 1.235 (+/- 1.09) | 0.91 |
| Mutation           | BRCA 1                     | 3 (30%)          | 0                | 0.33 |
|                    | BRCA 2                     | NA               | NA               |      |
| Hypertension       |                            | 13 (36.1%)       | 2 (14.3%)        | 0.24 |
| Diabetes           |                            | 4 (12.1%)        | 0                | 0.3  |
| Smoking            |                            | 4 (11.8%)        | 2 (12.5%)        | 1    |
| Histologic type    | Serous                     | 20 (41.7%)       | 9 (42.9%)        | 0.87 |
|                    | Endometrioid               | 14 (29.2%)       | 8 (38.1%)        |      |
|                    | Clear Cell                 | 11 (22.9%)       | 3 (14.3%)        |      |
|                    | Mucinous                   | 3 (6.2%)         | 1 (4.8%)         |      |
| Grade              | 1                          | 10 (71.4%)       | 1 (25%)          | 0.16 |
|                    | 2                          | 3 (21.4%)        | 2 (50%)          |      |
|                    | 3                          | 1 (7.1%)         | 1 (25%)          |      |
| FIGO Stage         | I                          | 36 (75%)         | 20 (95.2%)       | 0.09 |
|                    | IIA                        | 12 (25%)         | 1 (4.8%)         |      |
| Type of recurrence | Lymph node                 | 3 (20%)          | 0 (0%)           | 0.87 |
|                    | Peritoneal Carcinomatosis  | 8 (53.3%)        | 4 (80%)          |      |
|                    | Metastasis                 | 2 (13.3%)        | 1 (20%)          |      |

Table S3: Characteristics of Patients in the advanced-stage group. Time-to-Chemotherapy before and after 6 weeks

| Variables                  |                            | ≤6 weeks (n = 89) | >6 weeks (n = 75) | p     |
|----------------------------|----------------------------|-------------------|-------------------|-------|
| Age (years)                |                            | 59 (+/- 12)       | 61 (+/- 11)       | 0.2   |
| BMI (Kg/m <sup>2</sup> )   |                            | 23.95 (+/- 4.67)  | 24.68 (+/- 4.05)  | 0.31  |
| Hormonal Status            | Menopause                  | 63 (76.8%)        | 56 (78.9%)        | 0.76  |
|                            | Menopausal Hormone Therapy | 17 (33.3%)        | 14 (31.8%)        | 0.88  |
| Parity                     |                            | 1.976 (+/- 1.5)   | 1.625 (+/- 1.42)  | 0.14  |
| Mutation                   | BRCA 1                     | 3 (13.6%)         | 9 (40.9%)         | 0.098 |
|                            | BRCA 2                     | 4 (18.2%)         | 1 (4.5%)          |       |
| Hypertension               |                            | 12 (17.9%)        | 15 (27.8%)        | 0.2   |
| Diabetes                   |                            | 3 (4.6%)          | 3 (6.1%)          | 1     |
| Smoking                    |                            | 3 (5.7%)          | 3 (7.7%)          | 0.7   |
| Histologic type            | Serous                     | 68 (86.1%)        | 58 (79.5%)        | 0.54  |
|                            | Endometrioid               | 7 (8.9%)          | 8 (11%)           |       |
|                            | Clear Cell                 | 4 (5.1%)          | 5 (6.8%)          |       |
|                            | Mucinous                   | 0                 | 2 (2.7%)          |       |
| Grade                      | 1                          | 4 (66.7%)         | 6 (85.7%)         | 0.71  |
|                            | 2                          | 1 (16.7%)         | 1 (14.3%)         |       |
|                            | 3                          | 1 (16.7%)         | 0                 |       |
| Lymphovascular involvement | space                      | 22 (46.8%)        | 13 (39.4%)        | 0.51  |
| FIGO Stage                 | IIB                        | 2 (2.2%)          | 2 (2.7%)          | 0.44  |
|                            | III                        | 74 (83.1%)        | 67 (89.3%)        |       |
|                            | IV                         | 13 (14.6%)        | 6 (8%)            |       |
| Type of recurrence         | Lymph node                 | 7 (16.7%)         | 6 (17.6%)         | 0.24  |
|                            | Peritoneal Carcinomatosis  | 31 (73.8%)        | 20 (58.8%)        |       |
|                            | Metastasis                 | 1 (2.4%)          | 5 (14.7%)         |       |

Table S4: Characteristics of Patients in the advanced-stage group. Time-to-Chemotherapy before and after 8 weeks

| Variables                        |                            | ≤8 weeks (n = 126) | >8 weeks (n = 34) | p     |
|----------------------------------|----------------------------|--------------------|-------------------|-------|
| Age (years)                      |                            | 60 (+/- 12)        | 59 (+/- 12)       | 0.69  |
| BMI (Kg/m2)                      |                            | 24.23 (+/- 4.19)   | 24.5 (+/- 5.09)   | 0.75  |
| Hormonal Status                  | Menopause                  | 93 (78.8%)         | 26 (74.3%)        | 0.57  |
|                                  | Menopausal Hormone Therapy | 24 (32.4%)         | 7 (33.3%)         | 0.94  |
| Parity                           |                            | 1.975 (+/- 1.51)   | 1.297 (+/- 1.22)  | 0.014 |
| Mutation                         | BRCA 1                     | 9 (27.3%)          | 3 (27.3%)         | 0.64  |
|                                  | BRCA 2                     | 4 (12.1%)          | 1 (9.1%)          |       |
| Hypertension                     |                            | 19 (20.7%)         | 8 (27.6%)         | 0.43  |
| Diabete                          |                            | 4 (4.7%)           | 2 (7.1%)          | 0.63  |
| Smoking                          |                            | 4 (5.6%)           | 2 (9.5%)          | 0.62  |
| Histological type                | Serous                     | 96 (82.8%)         | 30 (83.3%)        | 0.45  |
|                                  | Endometrioid               | 13 (11.2%)         | 2 (5.6%)          |       |
|                                  | Clear Cells                | 6 (5.2%)           | 3 (8.3%)          |       |
|                                  | Mucinous                   | 1 (0.9%)           | 1 (2.8%)          |       |
| Grade                            | 1                          | 6 (75%)            | 4 (80%)           | 1     |
|                                  | 2                          | 1 (12.5%)          | 1 (20%)           |       |
|                                  | 3                          | 1 (12.5%)          | 0 (0%)            |       |
| lymphovascular space involvement |                            | 27 (45.8%)         | 8 (38.1%)         | 0.54  |
| FIGO Stage                       | IIB                        | 4 (3.1%)           | 0 (0%)            | 0.82  |
|                                  | III                        | 108 (85%)          | 33 (89.2%)        |       |
|                                  | IV                         | 15 (11.8%)         | 4 (10.8%)         |       |
| Type of recurrence               | Lymph node                 | 9 (15.3%)          | 4 (23.5%)         | 0.64  |
|                                  | Peritoneal Carcinomatosis  | 39 (66.1%)         | 12 (70.6%)        |       |
|                                  | Metastasis                 | 6 (10.2%)          | 0 (0%)            |       |

Table S5: Univariate Cox regression model – Recurrence-free Survival

| Variable                    |                            | HR on RFS        | <i>p</i> |
|-----------------------------|----------------------------|------------------|----------|
| Time To Chemotherapy (days) |                            | 1.03 [0.98-1.09] | 0.23     |
| Age of diagnosis (years)    |                            | 1.01 [0.99-1.02] | 0.46     |
| BMI (Kg/m <sup>2</sup> )    |                            | 1.01 [0.97-1.06] | 0.53     |
| Hormonal Status             | Menopause                  | 0.95 [0.6-1.51]  | 0.83     |
|                             | Menopausal Hormone Therapy | 1.28 [0.75-2.17] | 0.37     |
| Parity                      |                            |                  |          |
| Mutation                    | BRCA 1                     | 1.38 [0.56-3.39] | 0.83     |
|                             | BRCA 2                     | 1.8 [0.52-6.28]  |          |
| Hypertension                |                            | 1.2 [0.74-1.95]  | 0.46     |
| Diabetes                    |                            | 1.61 [0.7-3.69]  | 0.26     |
| Smoking                     |                            | 2.07 [0.88-4.89] | 0.09     |
| Histologic type             | Serous                     | 1                | 0.92     |
|                             | Endometrioid               | 0.96 [0.42-2.18] |          |
|                             | Clear Cells                | 1.45 [0.39-5.33] |          |
|                             | Mucinous                   | 0.97 [0.5-1.9]   |          |
| Grade                       | 1                          | 0.13 [0.01-1.28] | 0.087    |
|                             | 2                          | 0.29 [0.02-3.31] |          |
|                             | 3                          | 1                |          |
| Lymphovascular involvement  | space                      | 1.28 [0.68-2.4]  | 0.45     |
| Stage                       | Early                      | 1.33 [0.86-2.05] |          |
|                             | Advanced                   | 1                | 0.19     |
| FIGO Stage                  | I                          |                  |          |
|                             | II                         |                  |          |
|                             | III                        |                  |          |
|                             | IV                         |                  |          |
| Type of recurrence          | Lymph node                 | 2.41 [0.8-7.22]  | 0.35     |
|                             | Peritoneal Carcinomatosis  | 2.46 [0.89-6.8]  |          |
|                             | Metastasis                 | 2.24 [0.68-7.4]  |          |

Table S6: Multivariate Cox regression model – Recurrence-free Survival

|                      | HR on RFS         | <i>p</i> |
|----------------------|-------------------|----------|
| Time To Chemotherapy | 1.03 [0.81-1.32]  | 0.79     |
| Smoking              | 2.00 [0.22-18.12] | 0.54     |
| Early stages         | 2.68 [0.64-11.30] | 0.1794   |
| Grade 1              | 0.04 [0-0.72]     | 0.02891  |
| Grade 2              | 0.08 [0-1.53]     | 0.09283  |
